# Supplementary material
Source: PubMed Central journal article supplement (PMC4343087)
Supplement: pnas.201500788SI.pdf [file pnas.201500788SI.pdf]

# Supporting Information

Wei et al. 10.1073/pnas.1500788112

```

..... FW1 .....
1  GAGGTGCAGCTGTGGAGTCTGGGGGAGGCTTGGTACAGCCTGGGGGGTCCCTGAGACTCTCTGTGC 68
..... CDR1 ..... FW2 .....
69  AGCCTCTGGATTACCTTTAGCAGCTATGCCATGAGCTGGTCCGCCAGGCTCCAGGGAAGGGGCTGGA 137
..... CDR2 .....
138  GTGGGTCTCAGCTATTAGTGGTAGTGGTGGTAGCACATACTACGCAGACTCCGTGAAGGGCCGGTTTAC 206
..... FW3 .....
207  CATCTCAGAGACAATTCCAAGAACACGCTGTATCTGCAAATGAACAGCCTGAGAGCCGAGGACACGGC 275
.....
276  CGTATATTACTGT 288
    
```

Fig. S1. Germ line *IGHV3-23\*01* DNA sequence. FWs and CDRs are marked on top of each row of the DNA sequences. Bolded motifs are overlapping hotspots (WGCW) AGCT sites. On each side, the nucleotide positions are labeled.

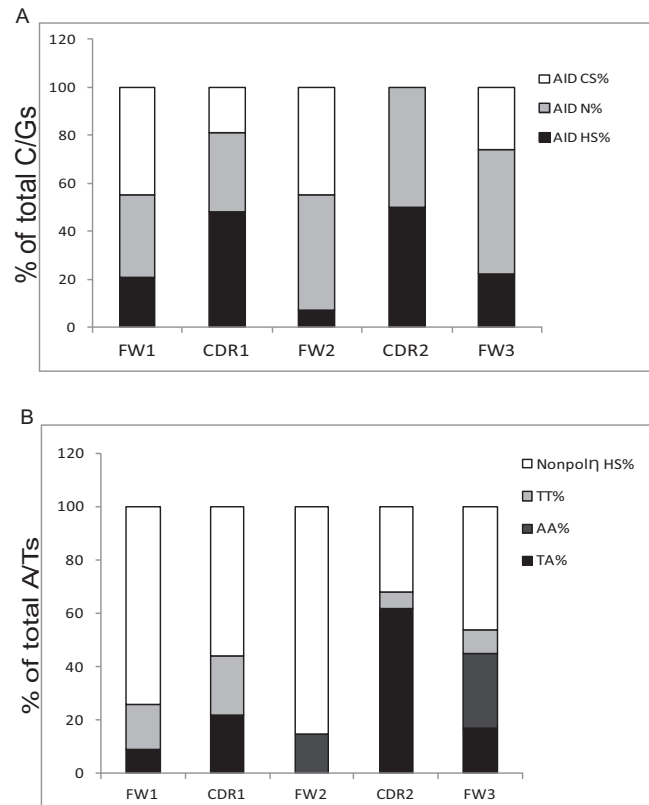

Fig. S2. AID and Polι DNA motifs in *IGHV3-23\*01*. (A) Percentage of AID hot/cold/neutral spots. Each bar shows the total Cs on both DNA strands in each FW or CDR, as labeled on the bottom. The black part in the bar demonstrates the percentage of AID hotspots (AID HS%) in the total Cs of each FW or CDR. The dark gray part shows the percentage of AID neutral spots (AID N%), and the white part shows the percentage of AID cold spots (AID CS%). (B) Polι hotspot percentage. Each bar represents the total As and Ts in each FW or CDR. The black part in the bar tells the percentage of ATs in TA motifs of the total ATs (TA%) in each FW or CDR, as labeled on the bottom. The dark gray part shows the percentage of ATs in AA motifs (AA%), and the light gray part shows the percentage of ATs in TT motifs (TT%). The white part is the percentage of ATs in non-Polι hotspots (nonPolι HS%). Fisher test is done for analyzing the significances of the comparisons.
